# Supplementary material for: Impact electrochemistry: colloidal metal sulfide detection by cathodic particle coulometry
Source: Royal Society of Chemistry journal article supplement (doi:10.1039/c5cp05004a), 2015-01-01
Supplement: c5cp05004a1.pdf [file c5cp05004a1.pdf]

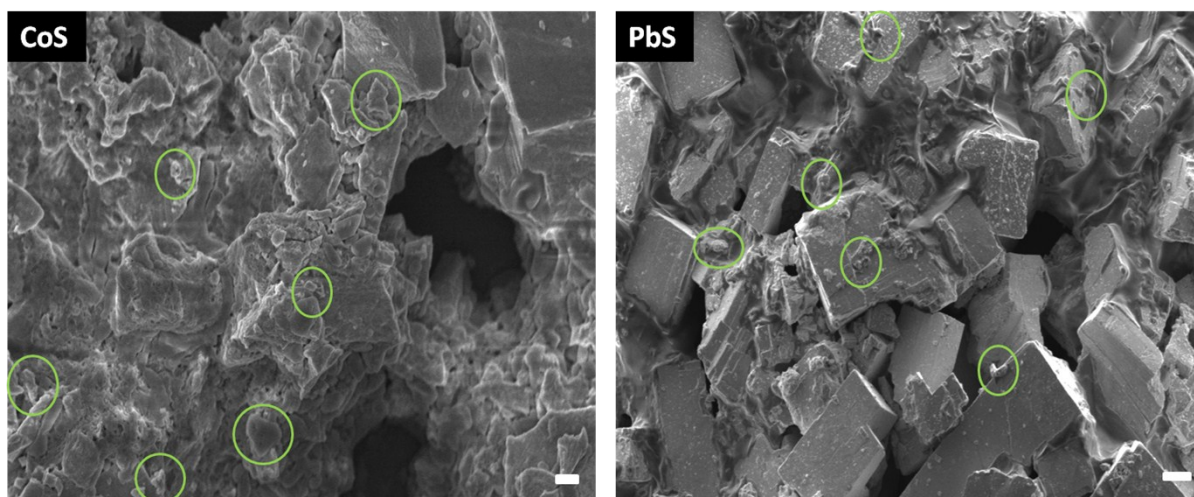

**Figure S1.** Scanning electron microscopy (SEM) images of CoS and PbS. Scale bars at 1  $\mu\text{m}$  and 10  $\mu\text{m}$  respectively.
